# Supplementary material
Source: publisher site journal article supplement (https://www.dovepress.com/article/455032)
Supplement: Supplementary file 1 [file get_supplementary_file.php]

**Table S1**. Material composition of all prepared transdermal nanocarriers formulation.

| **Group** | **Tween 80 (wt%)** | **Limonene (wt%)** | **D.D Water (wt%)** |
| --- | --- | --- | --- |
| TD-71 | 70 | 10 | 20 |
| TD-41 | 40 | 10 | 50 |
| TD-11 | 10 | 10 | 80 |
| TD-12 | 10 | 20 | 70 |
| TD-13 | 10 | 30 | 60 |
| TD-14 | 10 | 40 | 50 |
| TD-15 | 10 | 50 | 40 |
| TD-16 | 10 | 60 | 30 |
| TD-18 | 10 | 80 | 10 |

Abbreviations: TD = transdermal nanocarriers

**Table S2** Nano emulsion system of transdermal nanocarrier formula.

| **Group** | **Size (nm)** | | | **PDI** | | **Zeta (mV)** | | **T:L (wt%)** | | **Appearance** | |
| --- | --- | --- | --- | --- | --- | --- | --- | --- | --- | --- | --- |
| TD-71 | X | | | X | | X | | 1:0.14 | | Precipitate | |
| TD-41 | 94.6 0.79 | | | 0.547 0.01 | | -7.13 0.32 | | 1:0.25 | | Light milky | |
| TD-11 | 202.7 6.79 | | | 0.452 0.02 | | -12.7 0.40 | | 1:1 | | Light milky | |
| TD-12 | 187.5 4.01 | | | 0.282 0.03 | | -14.8 0.30 | | 1:2 | | Milky | |
| TD-13 | 415.8 7.25 | | | 0.492 0.01 | | -13.5 0.57 | | 1:3 | | Light milky | |
| TD-14 | 333.0 16.55 | | | 0.448 0.01 | | -11.1 0.51 | | 1:4 | | Milky | |
| TD-15 | 334.5 8.10 | | | 0.591 0.03 | | -13.6 0.61 | | 1:5 | | Turbidity | |
| TD-16 | 294.0 12.05 | | | 0.399 0.02 | | -14.6 0.42 | | 1:6 | | Turbidity | |
| TD-18 | 275.1 64.83 | | | 0.453 0.11 | | -12.8 0.44 | | 1:8 | | Turbidity | |
| **Group** | | **Tween80 : Limonene (wt%)** | **CBD (mg)** | **Size (nm)** | **PDI** | | **Zeta (mV)** | | **EE (%)** | | **DL (%)** |
| CTD-41 | | 1 : 0.25 | 200 | 174.1 0.87 | 0.195 0.01 | | -18.9 0.47 | | 87.83 3.24 | | 30.25 1.12 |
| CTD-12 | | 1 : 2 | 200 | 333.4 0.26 | 0.234 0.02 | | -44.2 0.27 | | 89.01 1.02 | | - 1. 3.44 |

Abbreviations: PDI, Polydiseperse Index; EE%, Encapsulation Efficiency; DL%, Drug Loaded ratio; TD = Transdermal nanocarriers; CTD = Cannabidiol loaded transdermal nanocarriers; CBD = Cannabidiol.

**Table S3.** Comparison CTD-12 with other studies CBD formulation system transdermal ability.

| **Formulation system** | **Performance** | **Ref** |
| --- | --- | --- |
| Micellar vesicular nanocarriers | CTD-12  0-24 hr: 3521.45 ± 200.86 mcg = 11918.26 ± 638.74 nmol  Flux: 83.07 ± 4.74 mcg/hr∙ = 264.16 ± 15.07 nmol/ |  |
| Gel + Penetration enhancer | Twice dosage(12hr/times) 4 % CBD gel  0-24 hr: 87.5 ± 19.5 nmol  Flux: 2.9 ± 0.6 nmol/ | US20100273895A174  CA2760460C75 |
| CBD + Penetration enhancer | CBD  0-48 hr: 193.21 ± 22.77 nmol  Flux: 6.13 ± 0.43 nmol/  CBD + transcutol hp (TC-HP)  0-48 hr: 503.98 ± 109.94 nmol  Flux: 14.81 ± 1.08 nmol/  CBD + super refined® novol nf(OA)  0-48 hr: 688.09 ± 154.27 nmol  Flux: 14.69 ± 1.7 nmol/  CBD + labrafil® m1944 cs (LF)  0-48 hr: 670.54 ± 184.73 nmol  Flux: 614.9 ± 3.02 nmol/ | US8435556B276 |
| Microneedle drug delivery system | CBD  0-48 hr: 0 ± 0 nmol  Flux: 0 ± 0 nmol/  ALL00179  0-48 hr: 3110.7 ± 686.0 nmol  Flux: 63.2 ± 11.4 nmol/ | US9533942B277 |
| NLC | CBD-NLC1  Flux: 15.56 ± 1.22 mcg/  CBD-NLC2  Flux: 16.47 ± 1.81 mcg/  CBD-NLC3  Flux: 11.00 ± 1.02 mcg/  CBD-NLC4  Flux: 12.52 ± 2.71 mcg/ | 78 |
| Transfersome and Micelle system | Transfersome  Flux: 0.07 ± 0.02 mcg/  Micelle system  Flux: 0.19 ± 0.10 mcg/ | 79 |
| Micelles-in-Liposome Systems | DiMiL system  0-24 hr: < 1.8 mcg/cm2  24 hr in skin: 4.67 ± 1.23 mcg/cm2 | 80 |
| Oil-in-water nano emulsions | Oil-in-water nanoemulsions  0-30 hr: 572.56 ± 211.11 mcg/cm  steady-state flux: 403.37 ± 130.09 mcg/  Oil-in-water nano emulsion-filled hydrogels  0-30 hr: 709.22 ± 220.62 mcg/cm  steady-state flux: 475.68 ± 162.57 mcg/ | 81 |
| Pickering emulsion | Formulation 1 - olive oil  24 hr Stratum corneum: 105.92 ± 12.95 mcg/cm2  viable epidermis and dermis: 38.06 ± 8.05 mcg/cm2  Receptor fluid: 4.06 ± 1.01 mcg/cm2  Residual sample (skin surface): 2846.02 ± 104.41 mcg/cm2  Formulation 2 - liquid paraffin  24 hr Stratum corneum: 123.11 ± 17.59 mcg/cm2  viable epidermis and dermis: 35.67 ± 7.50 mcg/cm2  Receptor fluid: 3.78 ± 1.00 mcg/cm2  Residual sample (skin surface): 2785.30 ± 139.75 mcg/cm2  Formulation 3 - olive oil  24 hr Stratum corneum: 77.47 ± 12.33 mcg/cm2  viable epidermis and dermis: 19.79 ± 4.67 mcg/cm2  Receptor fluid: 0.80 ± 1.03 mcg/cm2  Residual sample (skin surface): 2579.72 ± 55.07 mcg/cm2  Formulation 4 - liquid paraffin  24 hr Stratum corneum: 64.82 ± 9.770 mcg/cm2  viable epidermis and dermis: 15.34 ± 5.37 mcg/cm2  Receptor fluid: 0.64 ± 0.77 mcg/cm2  Residual sample (skin surface): 2546.36 ± 104.93 mcg/cm2 | 82 |

Abbreviations: CTD = Cannabidiol loaded transdermal nanocarriers; CBD = Cannabidiol.

**Table S4.** Comparison of CBD pharmacokinetics of PCTD-12 and other studies.

| **Method** | **Performance** | **Ref** |
| --- | --- | --- |
| Self-assembled Nanoparticle | PK- PCTD-12  C max: 189.16 ± 4.46 ng/ml  T max: 4 hr  AUC 0-8 hr : 1338.8 69.22 ng/ml∙hr  AUC 0-24 hr : 3522.81 191.25 ng/ml∙hr |  |
| Zein and Whey Protein  Co-solvent with anti-solvent precipitation | PK- Oral 12mg  C max: 0.47 mcg/ml = 470 ng/ml  T max: 2 hr  AUC 0-12 hr : 2.42 mcg/ml∙hr = 2420 ng/ml∙hr  AUC 0-limit hr : 2.91 mcg/ml∙hr = 2910 ng/ml∙hr | 50 |
| transdermal delivery formulation | PK- AEM.CBD006 (78.69 mg/kg)  C max: 427.149 ng/ml  T max: 2 hr  AUC 0-8 hr : 1758 ng/ml∙hr  PK- AEM.CBD007 (76.61 mg/kg)  C max: 360.351 ng/ml  T max: 2 hr  AUC 0-8 hr : 1563 ng/ml∙hr  PK- AEM.CBD010 (155.24 mg/kg)  C max: 602.168 ng/ml  T max: 4 hr  AUC 0-8 hr : 3067 ng/ml∙hr  PK- AEM.CBD011 (75.76 mg/kg)  C max: 331.560 ng/ml  T max: 1 hr  AUC 0-8 hr : 1410 ng/ml∙hr | US10842758B190  US11026896B291  US20230038462A192 |

Abbreviations: AUC0-t hr = area under the curve-time curve from 0 to the time point; CBD = Cannabidiol; PCTD = patch of cannabidiol loaded transdermal nanocarriers.


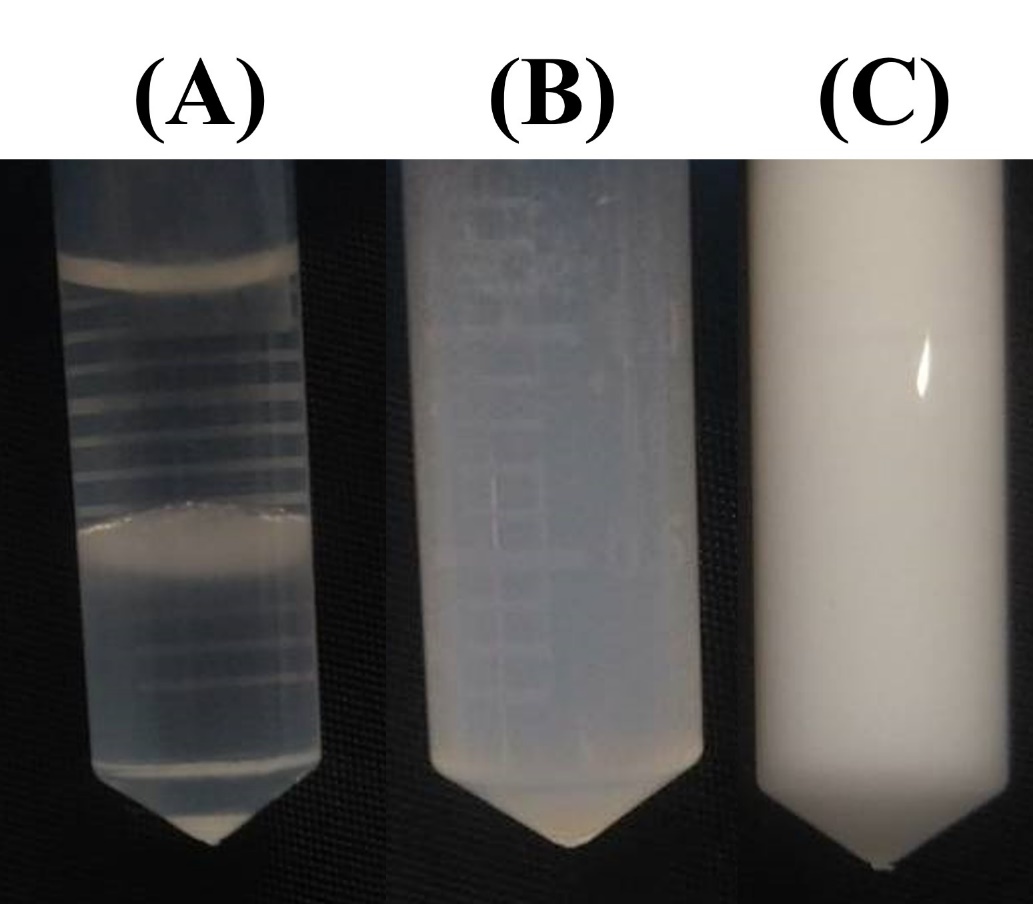


**Figure S1** Appearance of TD series (A)precipitate, (B)turbidity, (C)Milky.


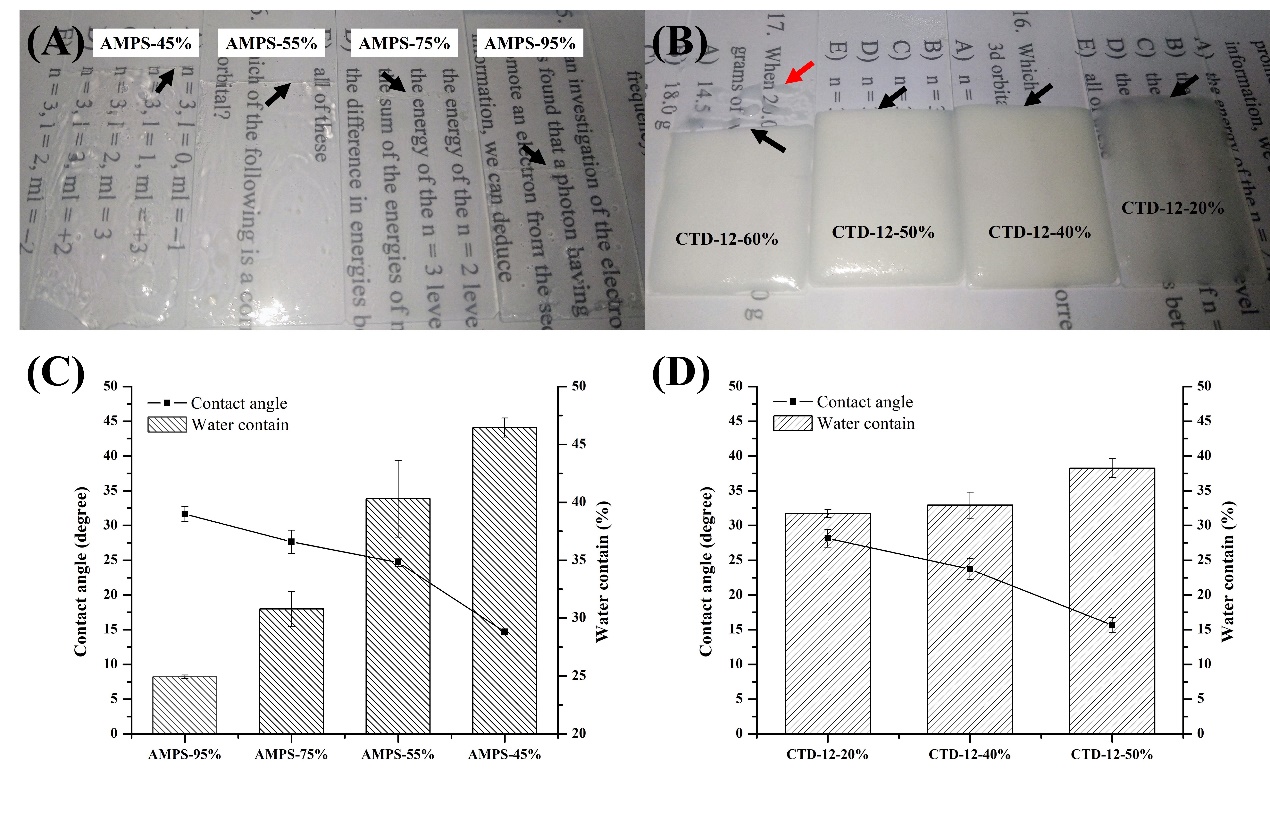


**Figure S2** the properties of the prototype CTD-NCs AMPS gel. The appearance of (A) AMPS-gel (B) CTD-NCs-AMPS gel. The contact angle and water contain of (C) AMPS-series gel (D) CTD-NCs-AMPS gel. The black arrow indicates the gel boundary position, which used to cut to confirm whether curing is complete. Red arrow indicates incomplete curing part of the gel.
